## Complex interactions between cis-regulatory modules in native conformation are critical for *Drosophila snail* expression

Leslie Dunipace, Anil Ozdemir and Angelike Stathopoulos

There was an error published in *Development* 138, 4075-4084.

The authors inadvertently re-displayed the image from Fig. 1D in Fig. 1B. The corrected Fig. 1 is shown below. This change does not affect or alter the results or conclusions of the study.

The authors apologise to readers for this mistake.

In addition, the authors wish to clarify that the images shown in Fig. 6A, 6B and 6C are unmanipulated versions of those shown in Fig. 5D, 5B and 5A, respectively.

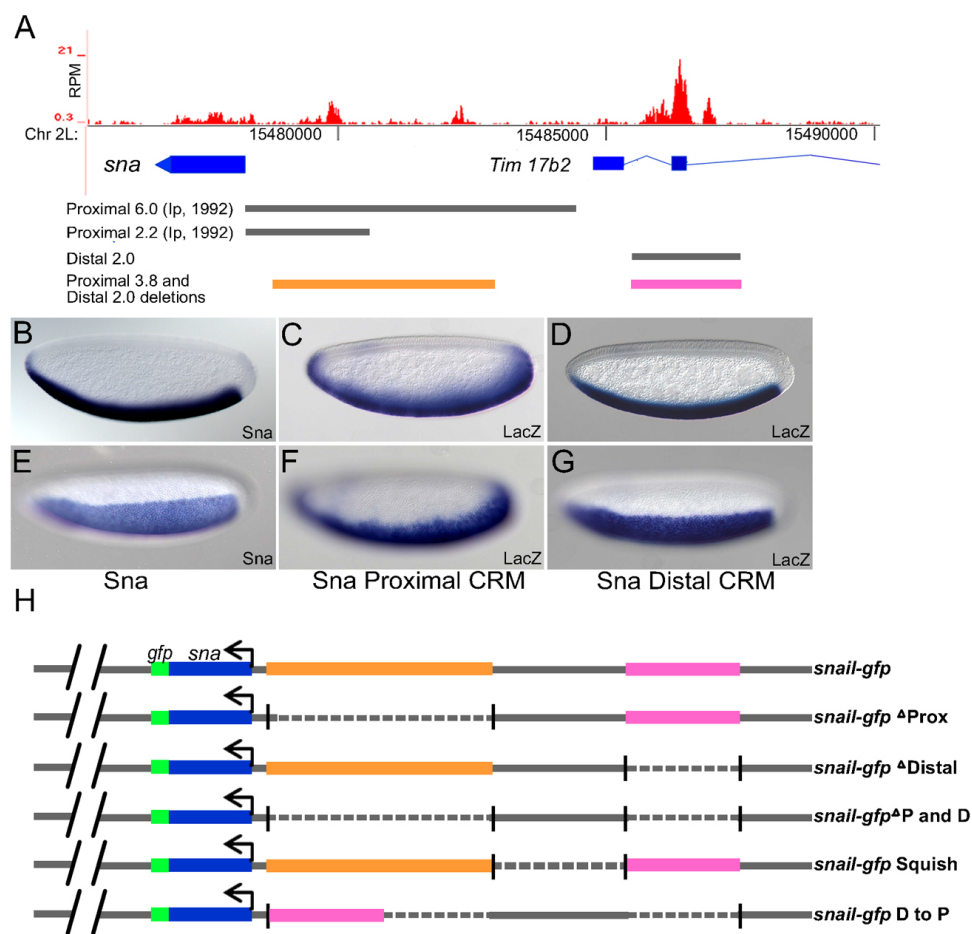

Source: https://cob.silverchair.com/dev/article-pdf/138/20/4566/1159208/4566.pdf
